# Supplementary material for: Precision medicine in neurodegeneration: the IHI-PROMINENT project
Source: PubMed Central journal article supplement (PMC10433183; doi:10.3389/fneur.2023.1175922), 2023-08-02
Supplement: Table_1.pdf [file Table_1.pdf]

Supplemental Table 1. Overview of data sources

| Data source | Country | Year established | Sample                                | Source        | Follow-up | Data available                                                                                                                                                                                                                                                                                                                             |
|-------------|---------|------------------|---------------------------------------|---------------|-----------|--------------------------------------------------------------------------------------------------------------------------------------------------------------------------------------------------------------------------------------------------------------------------------------------------------------------------------------------|
| SveDem [23] | Sweden  | 2007             | 109,000 patients with MCI or dementia | Population    | annual    | <input checked="" type="checkbox"/> Cognitive function<br><input type="checkbox"/> Fluid biomarkers<br><input type="checkbox"/> Neuroimaging<br><input type="checkbox"/> Genetic<br><input checked="" type="checkbox"/> Comorbidities<br><input checked="" type="checkbox"/> Treatment<br><input checked="" type="checkbox"/> Life factors |
| GEDOC [24]  | Sweden  | 1998             | >7000                                 | Memory clinic |           | <input checked="" type="checkbox"/> Cognitive function<br><input checked="" type="checkbox"/> Fluid biomarkers<br><input checked="" type="checkbox"/> Neuroimaging<br><input checked="" type="checkbox"/> Genetic                                                                                                                          |

|                             |         |  |                                                           |                 |               |                                                                                                                                                                                                                                                                                                                                                       |
|-----------------------------|---------|--|-----------------------------------------------------------|-----------------|---------------|-------------------------------------------------------------------------------------------------------------------------------------------------------------------------------------------------------------------------------------------------------------------------------------------------------------------------------------------------------|
|                             |         |  |                                                           |                 |               | <input type="checkbox"/> Comorbidities<br><input type="checkbox"/> Treatment<br><input type="checkbox"/> Life factors                                                                                                                                                                                                                                 |
| Kuopio Research Cohort [25] | Finland |  | 200 participants including patients and controls          | Memory clinic   | annual        | <input checked="" type="checkbox"/> Cognitive function<br><input checked="" type="checkbox"/> Fluid biomarkers<br><input checked="" type="checkbox"/> Neuroimaging<br><input type="checkbox"/> Genetic<br><input checked="" type="checkbox"/> Comorbidities<br><input checked="" type="checkbox"/> Treatment<br><input type="checkbox"/> Life factors |
| ALFA+ [26]                  | Spain   |  | 420 unimpaired participants, most children of AD patients | Research cohort | Every 3 years | <input checked="" type="checkbox"/> Cognitive function<br><input checked="" type="checkbox"/> Fluid biomarkers<br><input checked="" type="checkbox"/> Neuroimaging<br><input checked="" type="checkbox"/> Genetic                                                                                                                                     |

|                |         |      |                                                                                       |                 |        |                                                                                                                                                                                                                                                                                                                                            |
|----------------|---------|------|---------------------------------------------------------------------------------------|-----------------|--------|--------------------------------------------------------------------------------------------------------------------------------------------------------------------------------------------------------------------------------------------------------------------------------------------------------------------------------------------|
|                |         |      |                                                                                       |                 |        | <input type="checkbox"/> Comorbidities<br><input type="checkbox"/> Treatment<br><input checked="" type="checkbox"/> Life factors                                                                                                                                                                                                           |
| BETA-AARC [27] | Spain   | 2022 | 200 participants with SCD or MCI                                                      | Research cohort | annual | <input checked="" type="checkbox"/> Cognitive function<br><input checked="" type="checkbox"/> Fluid biomarkers<br><input checked="" type="checkbox"/> Neuroimaging<br><input type="checkbox"/> Genetic<br><input type="checkbox"/> Comorbidities<br><input type="checkbox"/> Treatment<br><input checked="" type="checkbox"/> Life factors |
| DELCODE [28]   | Germany | 2015 | 1000 participants including AD patients, controls, and unimpaired with a first degree | Memory clinic   | annual | <input checked="" type="checkbox"/> Cognitive function<br><input checked="" type="checkbox"/> Fluid biomarkers<br><input checked="" type="checkbox"/> Neuroimaging<br><input type="checkbox"/> Genetic                                                                                                                                     |

|              |        |      |                                                                                              |                 |        |                                                                                                                                                                                                                                                                                                                                                                             |
|--------------|--------|------|----------------------------------------------------------------------------------------------|-----------------|--------|-----------------------------------------------------------------------------------------------------------------------------------------------------------------------------------------------------------------------------------------------------------------------------------------------------------------------------------------------------------------------------|
|              |        |      | relative with AD                                                                             |                 |        | <input type="checkbox"/> Comorbidities<br><input type="checkbox"/> Treatment<br><input type="checkbox"/> Life factors                                                                                                                                                                                                                                                       |
| MEMENTO [29] | France | 2011 | 2323 patients with MCI or dementia                                                           | Memory clinic   | annual | <input checked="" type="checkbox"/> Cognitive function<br><input checked="" type="checkbox"/> Fluid biomarkers<br><input checked="" type="checkbox"/> Neuroimaging<br><input checked="" type="checkbox"/> Genetic<br><input checked="" type="checkbox"/> Comorbidities<br><input checked="" type="checkbox"/> Treatment<br><input checked="" type="checkbox"/> Life factors |
| REAL AD [30] | Sweden | 2023 | Collection not yet started; aims to provide a reference panel for normal cognitive tests and | Research cohort | NA     | <input checked="" type="checkbox"/> Cognitive function<br><input checked="" type="checkbox"/> Fluid biomarkers<br><input checked="" type="checkbox"/> Neuroimaging<br><input type="checkbox"/> Genetic                                                                                                                                                                      |

|                                |                 |      |                  |               |        |                                                                                                                                                                                                                                                                                                                                                                             |
|--------------------------------|-----------------|------|------------------|---------------|--------|-----------------------------------------------------------------------------------------------------------------------------------------------------------------------------------------------------------------------------------------------------------------------------------------------------------------------------------------------------------------------------|
|                                |                 |      | biomarker values |               |        | <input type="checkbox"/> Comorbidities<br><input type="checkbox"/> Treatment<br><input type="checkbox"/> Life factors                                                                                                                                                                                                                                                       |
| Amsterdam Dementia Cohort [31] | The Netherlands | 2000 | ~8000            | Memory clinic | annual | <input checked="" type="checkbox"/> Cognitive function<br><input checked="" type="checkbox"/> Fluid biomarkers<br><input checked="" type="checkbox"/> Neuroimaging<br><input checked="" type="checkbox"/> Genetic<br><input checked="" type="checkbox"/> Comorbidities<br><input checked="" type="checkbox"/> Treatment<br><input checked="" type="checkbox"/> Life factors |
